# Supplementary material
Source: PubMed Central journal article supplement (PMC6902730)
Supplement: fj.201901213R.sf1.pdf [file fj.201901213R.sf1.pdf]

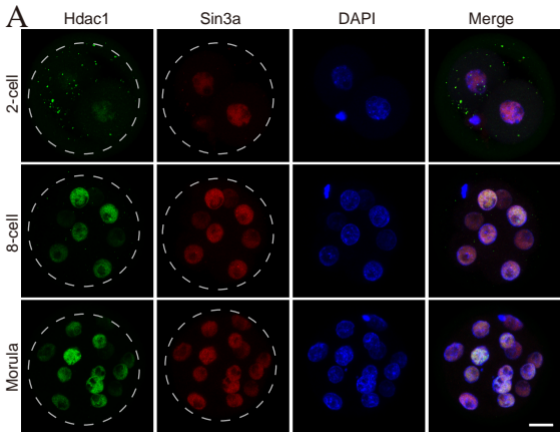

**Figure S1. Colocalization of Hdac1 and Sin3a during preimplantation development.**  
 (A) Immunocytochemical detection of Hdac1 and Sin3a from 2-cell to morula stage.
