# Supplementary material
Source: PubMed Central journal article supplement (PMC6902730)
Supplement: fj.201901213R.sf2.pdf [file fj.201901213R.sf2.pdf]

A

Type

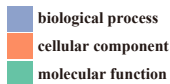

## The Most Enriched GO Terms of Up-regulated Genes

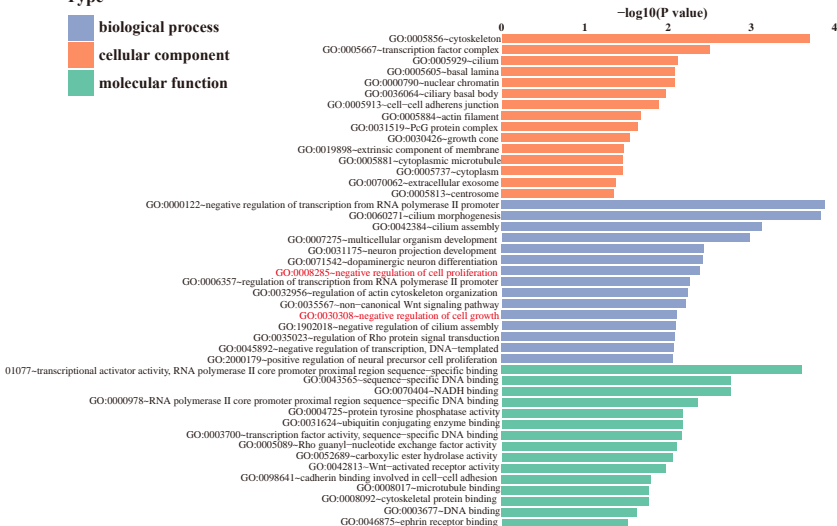

Figure S2. Transcriptomic analysis of embryos deficient of Sin3a.

(A) Gene ontology analysis of up-regulated genes in cKD embryos related to NC groups.
