# Supplementary material
Source: PubMed Central journal article supplement (PMC6902730)
Supplement: fj.201901213R.sf3.pdf [file fj.201901213R.sf3.pdf]

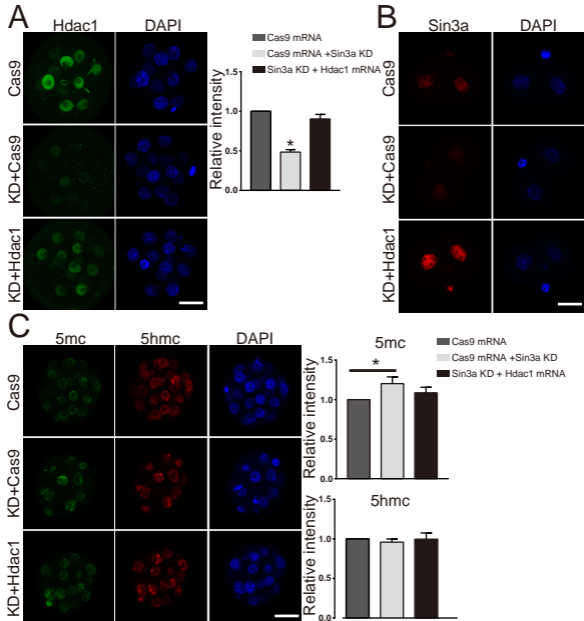

**Figure S3. Validation of Hdac1 ectopic expression in Sin3a knockdown embryos and its effect on genome-wide DNA methylation.**

(A and B) Immunocytochemical analysis of Hdac1 (A) and Sin3a (B) in embryos derived from zygotes injected with Cas9, Sin3a siRNAs with Cas9 (KD+Cas9), or Sin3a siRNAs with Hdac1 (KD+Hdac1). Notably, Hdac1 intensity decreased in KD+Cas9 and Hdac1 cRNA injection successfully increased Hdac1 intensity. Surprisingly, Sin3a intensity was also induced in response to ectopic Hdac1 expression. (C) Ectopic expression of Hdac1 did not restore global 5-methylcytosine (5mc). 5hmc: 5-hydroxymethylcytosine.
